# Supplementary material for: MACSE: Multiple Alignment of Coding SEquences Accounting for Frameshifts and Stop Codons
Source: PubMed Central journal article supplement (PMC3174933; doi:10.1371/journal.pone.0022594), 2011-09-16
Supplement: pone.0022594.s001.pdf [file pone.0022594.s001.pdf]

---

**Algorithm S1: Optimal pairwise computation cost for two coding DNA sequences**

---

**Data:** Two Sequences  $S_1$  and  $S_2$ , a *cost* method that returns the cost of frameshift, deletion and STOP codon, a  $\sigma$  method returning the AA substitution cost.

**Result:** An array  $C$  such that  $C[i][j] = score(\mathcal{A}(S_1[1 : i], S_2[1 : j]))$ .

**for**  $i = 0$  **to**  $len(S_1)$  **do**

**for**  $j = 0$  **to**  $len(S_2)$  **do**

**if**  $i == 0$  **AND**  $j = 0$  **then**

$C[i][j] = 0$ ;

**else**

$AA_1 = "?"$ ;  $AA_2 = "?"$ ;;

**if**  $i - 3 > 0$  **then**  $AA_1 = (\pi(S_1[i - 3 : i]))$ ;

**if**  $j - 3 > 0$  **then**  $AA_2 = (\pi(S_2[j - 3 : j]))$ ;

$stopS_1 = 0$ ;  $stopS_2 = 0$ ;

**if**  $AA_1 == "*"$  **then**  $stopS_1 = cost("*")$ ;

**if**  $AA_2 == "*"$  **then**  $stopS_2 = cost("*")$ ;

**if**  $AA_1 == "*"$  **OR**  $AA_2 == "*"$  **then**

$subst\_AA = stopS_1 + stopS_2$

**else**

**if**  $i - 3 > 0$  **AND**  $j - 3 > 0$  **then**

$subst\_AA = \sigma(AA_1, AA_2)$

**else**

$subst\_AA = +\infty$

$C[i][j] = \min \left\{ \begin{array}{l} get\_C(i - 3, j - 3) + subst\_AA \\ get\_C(i - 3, j) + stopS_1 + cost("-") \\ get\_C(i, j - 3) + cost("-") + stopS_2 \\ \\ get\_C(i - 3, j - 2) + stopS_1 + cost("!") \\ get\_C(i - 3, j - 1) + stopS_1 + cost("!") \\ get\_C(i - 2, j - 3) + cost("!") + stopS_2 \\ get\_C(i - 1, j - 3) + cost("!") + stopS_2 \\ \\ get\_C(i, j - 1) + cost("-") + cost("!") \\ get\_C(i, j - 2) + cost("-") + cost("!") \\ get\_C(i - 1, j) + cost("!") + cost("-") \\ get\_C(i - 2, j) + cost("!") + cost("-") \\ \\ get\_C(i - 1, j - 1) + 2 * cost("!") \\ get\_C(i - 1, j - 2) + 2 * cost("!") \\ get\_C(i - 2, j - 1) + 2 * cost("!") \\ get\_C(i - 2, j - 2) + 2 * cost("!") \end{array} \right.$

**return**  $C$ ;

---
